# Supplementary material for: Stomatin-like Protein 2 Promotes Tumor Cell Survival by Activating the JAK2-STAT3-PIM1 Pathway, Suggesting a Novel Therapy in CRC
Source: PubMed Central journal article supplement — Mol Ther Oncolytics. 2020 Mar 30;17:169–79. doi: 10.1016/j.omto.2020.03.010 (PMC7177985; doi:10.1016/j.omto.2020.03.010), 2020-03-30
Supplement: mmc1.pdf [file mmc1.pdf]

OMTO, Volume 17

## **Supplemental Information**

### **Stomatin-like Protein 2 Promotes Tumor Cell Survival by Activating the JAK2-STAT3-PIM1 Pathway, Suggesting a Novel Therapy in CRC**

**Qiang Liu, Anqi Li, Lisha Wang, Wei He, Ling Zhao, Chao Wu, Shasha Lu, Xuanguang Ye, Huiyong Zhao, Xiaohan Shen, Xiuying Xiao, and Zebing Liu**

# Supplementary Figure S1

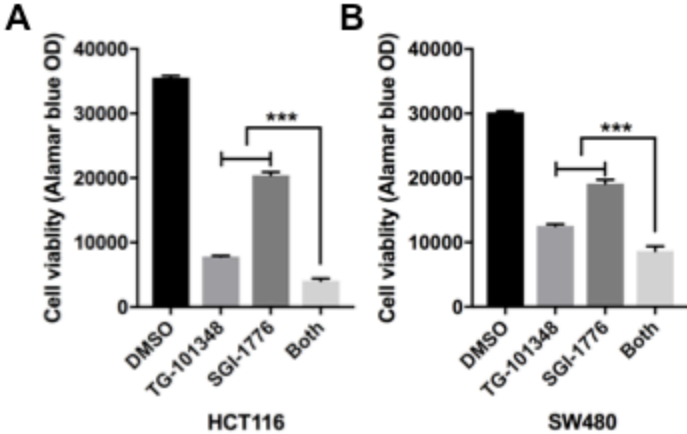

### **Supplementary Figure Legends**

**Supplementary Figure S1.** The combination of TG-101348 with SGI-1776 is synergistic in CRC. **A** and **B**, The bar plots show the relative cell viability with the treatment of DMSO, 1  $\mu$ M TG-101348, 2.5  $\mu$ M SGI-1776 and the combination in HCT116 and SW480 cells. Cell viability was assessed at 72 hours.

**Supplementary Table S1.** sgRNA sequences for the knockout of SLP-2 and the sequencing primer of SLP-2

| <b>sgRNA</b>   | <b>Forward primer (5' &gt;&gt; 3')</b> | <b>Reverse primer (5' &gt;&gt; 3')</b> |
|----------------|----------------------------------------|----------------------------------------|
| sg1            | CACCGGTTTCGGGGCAATCCAGAGG              | AAACCCTCTGGATTGCCCCGAAACC              |
| sg2            | CACCGTATCGGATCCGGTCTAACAC              | AAACGTGTTAGACCGGATCCGATAC              |
| sg3            | CACCGCATCAACGTGCCTGAGCAGT              | AAACACTGCTCAGGCACGTTGATGC              |
|                |                                        |                                        |
| <b>Primers</b> | <b>Forward primer (5' &gt;&gt; 3')</b> | <b>Reverse primer (5' &gt;&gt; 3')</b> |
| SLP-2          | TGCAAGAGGAAAGGCTCGGGTA                 | CTTGTAAAGGTCCATGATGCGC                 |

**Supplementary Table S3.** The correlation of SLP-2 expression with clinicopathological features in 491 patients with CRC

| Characteristics                   | n   | SLP-2 immunoreactivity |             | P value  |
|-----------------------------------|-----|------------------------|-------------|----------|
|                                   |     | Low (%)                | High (%)    |          |
| Age (years)                       |     |                        |             | 0.412    |
| <60                               | 208 | 118 (56.73)            | 90 (43.27)  |          |
| ≥60                               | 283 | 150 (53.00)            | 133 (47.00) |          |
| Sex                               |     |                        |             | 0.283    |
| Male                              | 231 | 132 (57.14)            | 99 (42.85)  |          |
| Female                            | 260 | 136 (52.30)            | 124 (47.69) |          |
| CEA (ng/ml)                       |     |                        |             | 0.256    |
| ≤ 5                               | 156 | 89 (57.05)             | 67 (42.95)  |          |
| > 5                               | 111 | 53 (47.75)             | 58 (52.25)  |          |
| Unknown                           | 224 | 126 (56.25)            | 98 (43.75)  |          |
| Histological type                 |     |                        |             | 0.100    |
| Adenocarcinoma                    | 380 | 215 (56.58)            | 165 (43.42) |          |
| Mucinous/SRCC                     | 111 | 53 (47.74)             | 58 (52.25)  |          |
| Predominant tumor differentiation |     |                        |             | < 0.0001 |
| High                              | 53  | 40 (75.47)             | 13 (24.53)  |          |
| Moderate                          | 348 | 208 (59.77)            | 140 (40.23) |          |
| Poor                              | 90  | 20 (22.22)             | 70 (77.78)  |          |
| Depth of tumor invasion           |     |                        |             | < 0.0001 |
| Tis, T1 and T2                    | 38  | 33 (86.84)             | 5 (13.16)   |          |
| T3 and T4                         | 453 | 235 (51.88)            | 218 (48.12) |          |
| Lymphatic and/or venous invasion  |     |                        |             | 0.004    |
| Absent                            | 436 | 248 (56.88)            | 188 (43.12) |          |
| Present                           | 55  | 20 (36.36)             | 35 (63.64)  |          |
| Nodal involvement                 |     |                        |             | < 0.0001 |
| Absent                            | 313 | 205 (65.50)            | 108 (34.50) |          |
| Present                           | 178 | 63 (35.39)             | 115 (64.61) |          |
| Distant metastasis                |     |                        |             | 0.009    |
| Absent                            | 438 | 248 (56.62)            | 190 (43.38) |          |
| Present                           | 53  | 20 (37.74)             | 33(62.26)   |          |
| TNM stage                         |     |                        |             | < 0.0001 |
| I and II                          | 293 | 197 (67.24)            | 96 (32.76)  |          |
| III and IV                        | 198 | 71 (35.86)             | 127 (64.14) |          |

NOTE. For statistical analyses, a chi-square or Fisher's exact test was used for between-group comparisons. Bold font indicates a significant difference. High, high level of SLP-2 expression; Low, low level of SLP-2 expression. The tumor stage was determined according to the TNM criteria.

**Supplementary Table S4.** Multivariate cox proportional hazard analysis of prognostic variables in CRC patients

| Variable           | Hazard ratio (95% CI) | <i>P</i> value |
|--------------------|-----------------------|----------------|
| Age                |                       |                |
| <60                | 0.533 (0.325-0.875)   | 0.013          |
| ≥60                | 1                     |                |
| Differentiation    |                       |                |
| High/moderate      | 0.601 (0.355-1.019)   | 0.059          |
| Poor               | 1                     |                |
| Distant metastasis |                       |                |
| Absent             | 0.329 (0.176-0.614)   | < 0.001        |
| Present            | 1                     |                |
| TNM stage          |                       |                |
| I and II           | 0.392 (0.235-0.652)   | < 0.001        |
| III and IV         | 1                     |                |
| SLP-2              |                       |                |
| Low expression     | 0.469 (0.272-0.808)   | 0.006          |
| High expression    | 1                     |                |

NOTE. Multivariate cox regression analysis was used to determine whether SLP-2 was independent of other clinical covariates. CI, confidence interval. Bold font indicates a significant difference.
